# Supplementary material for: Highly efficient and selective degradation of methylene blue from mixed aqueous solution by using monodisperse CuFe2O4 nanoparticles
Source: Royal Society of Chemistry journal article supplement (doi:10.1039/c5ra10543a), 2015-01-01
Supplement: c5ra10543a1.pdf [file c5ra10543a1.pdf]

## Supporting Information

### Highly Efficient and Selective Degradation of Methylene Blue from Mixed Aqueous Solution by Using Monodisperse $\text{CuFe}_2\text{O}_4$ Nanoparticles

Lingyun Wang,<sup>a,b</sup> Guowen Hu,<sup>b</sup> Zhiyi Wang,<sup>a</sup> Baodui Wang,<sup>b,\*</sup> Yumin Song,<sup>a,\*</sup> and Huiang Tang,<sup>c,\*</sup>

<sup>a</sup>College of Chemistry and Chemical Engineering, Northwest Normal University, Lanzhou, Gansu, 730070 (P.R. China). E-mail: songym@nwnu.edu.cn,

<sup>b</sup>Key Laboratory of Nonferrous Metal Chemistry and Resources Utilization of Gansu Province, State Key Laboratory of Applied Organic Chemistry, and Key Laboratory of Special Function Materials and Structure Design, Ministry of Education, Lanzhou University, Gansu, Lanzhou, 730000 (P.R. China). E-mail: wangbd@lzu.edu.cn.

<sup>c</sup>Key Laboratory for New Molecule Material Design and Function of Tianshui Normal University, Tianshui, Gansu 741001, PR China. E-mail: huiantang@163.com

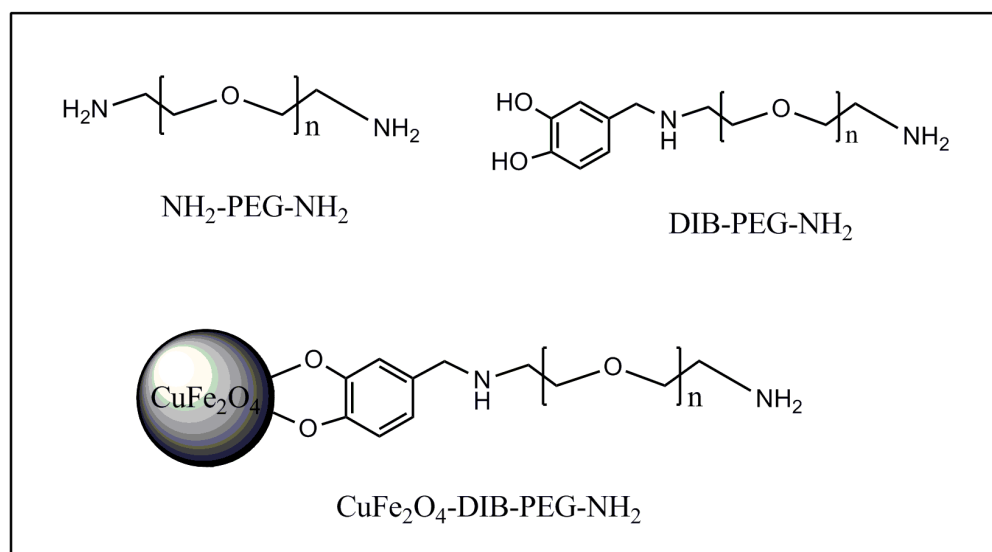

**Scheme S1.** Synthetic structures of  $\text{NH}_2\text{-PEG-NH}_2$ ,  $\text{DIB-PEG-NH}_2$  and  $\text{CuFe}_2\text{O}_4\text{-DIB-PEG-NH}_2$  (**1a**).

**Fig. S1.** Fourier transform infrared (FT-IR) spectra of (A)  $\text{CuFe}_2\text{O}_4$ -DIB-PEG- $\text{NH}_2$  (**1a**), (B)  $\text{CuFe}_2\text{O}_4$ , and (C) DIB-PEG- $\text{NH}_2$ .

**Fig. S2.** UV spectra of alone MB and MB in the presence of  $\text{NaBH}_4$ .

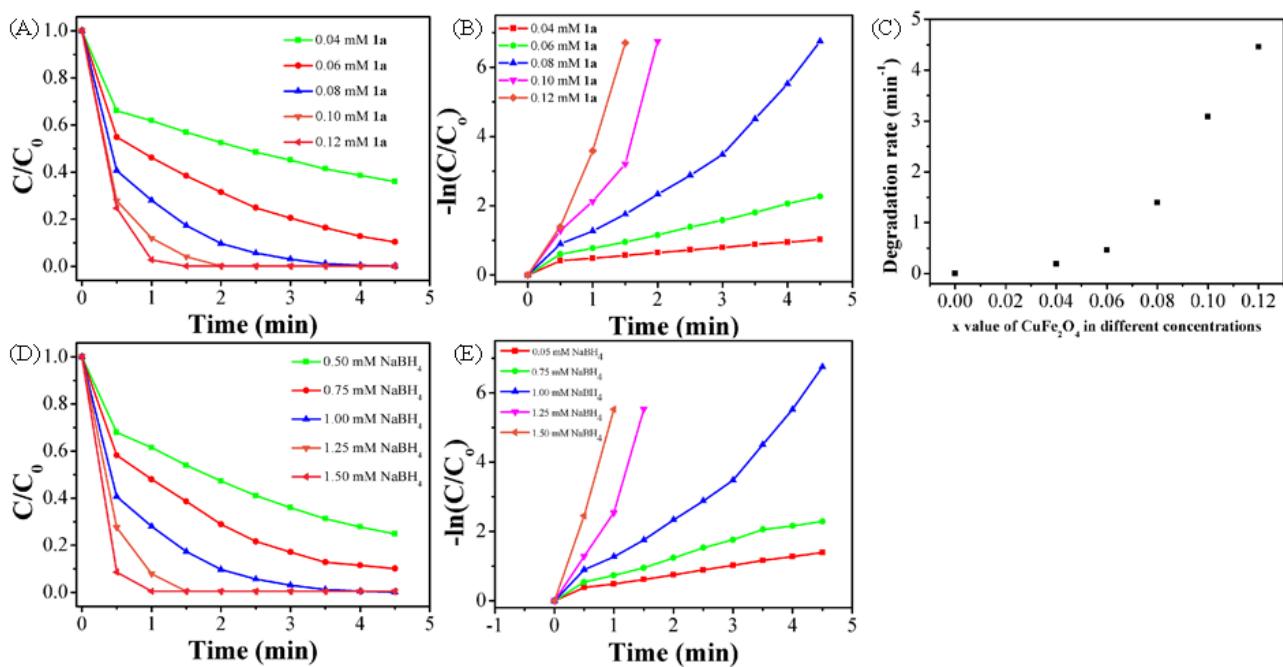

**Fig. S3.** (A)  $C/C_0$  versus reaction time for the different concentrations of **1a**, (B) First-order linear relationship between  $-\ln(C_t/C_0)$  and reaction time of **1a**, (C) Degradation rate and mineralization capabilities of **1a**, (D)  $C/C_0$  versus reaction time for the different concentrations of  $\text{NaBH}_4$ , (E) First-order linear relationship between  $-\ln(C_t/C_0)$  and reaction time of  $\text{NaBH}_4$ .

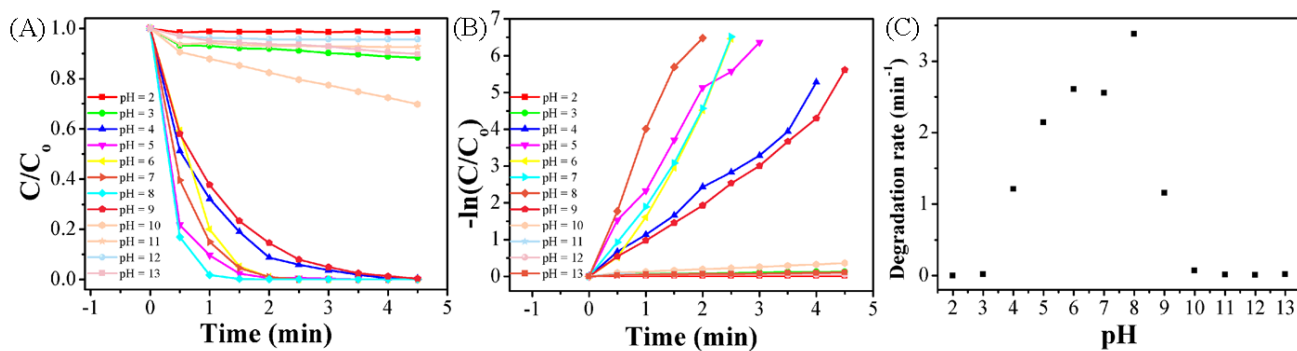

**Fig. S4.** (A)  $C/C_0$  versus reaction time for the different variation of pH, (B) First-order linear relationship between  $-\ln(C_t/C_0)$  and reaction time of pH, (C) Degradation rate of different variation of pH.

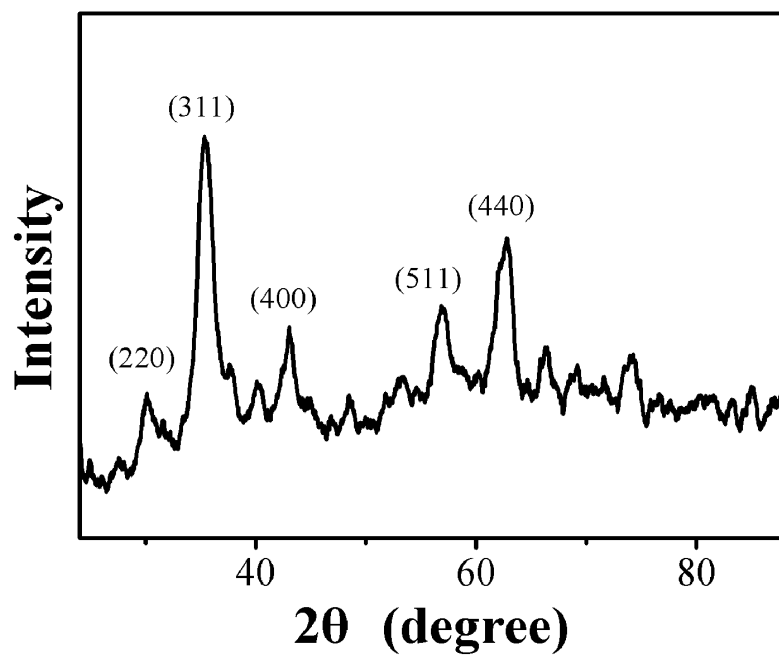

**Fig. S5.** The XRD of **1a** after ten successive cycles.
